# Supplementary material for: Design and analysis of a dual-rope crawler rope-climbing robot
Source: Copernicus journal article supplement (doi:10.5194/ms-15-31-2024), 2024-01-23
Supplement: Supplementary file 1 [file ms-15-31-2024-supplement.zip]

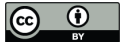

*Supplement of*

## **Design and analysis of a dual-rope crawler rope-climbing robot**

**Jinhang Wang et al.**

*Correspondence to:* Lairong Yin (yinlairong@hotmail.com)

- ms-15-31-2024-supplement-title-page.pdf
- Rope climbing robot with no load.mp4

The copyright of individual parts of the supplement might differ from the article licence.
