# Supplementary material for: Design and analysis of a dual-rope crawler rope-climbing robot
Source: Copernicus journal article supplement (doi:10.5194/ms-15-31-2024), 2024-01-23
Supplement: Supplementary file 2 [file ms-15-31-2024-supplement.zip]

Archive with 2 entries (2 files):
- ms-15-31-2024-supplement-title-page.pdf
- Rope climbing robot with no load.mp4
